# Supplementary material
Source: PubMed Central journal article supplement (PMC4587692)
Supplement: ASN.2014070696_ASN2014070696SupplementaryData.pdf [file ASN.2014070696_ASN2014070696SupplementaryData.pdf]

**Supplemental Table 1. Association of Urine PIIINP with CKD Progression Defined Using Serum Creatinine in Community-Living Elderly Participants in the Cardiovascular Health Study**

|                                                                      | Urine PIIINP Quartiles |                   |                   |                   | Urine PIIINP Continuous<br>(Per Doubling) |
|----------------------------------------------------------------------|------------------------|-------------------|-------------------|-------------------|-------------------------------------------|
|                                                                      | 1                      | 2                 | 3                 | 4                 |                                           |
| Urine PIIINP Range ( $\mu\text{g/L}$ )                               | $\leq 1.39$            | 1.40-2.58         | 2.59-4.22         | $> 4.22$          |                                           |
| No.                                                                  | 105                    | 121               | 97                | 99                |                                           |
| No. with CKD Progression*, n (%)                                     | 42 (40)                | 42 (35)           | 46 (47)           | 52 (53)           |                                           |
| Demographic Adjusted**; OR (95% CI)                                  | 1.00 (Ref.)            | 0.90 (0.51, 1.57) | 1.75 (0.91, 3.36) | 2.4 (1.16, 4.94)  | 1.26 (1.05, 1.52)                         |
| Plus eGFR <sub>Cr</sub> and urine albumin <sup>†</sup> ; OR (95% CI) | 1.00 (Ref.)            | 0.70 (0.39, 1.26) | 1.21 (0.61, 2.40) | 1.38 (0.63, 3.00) | 1.14 (0.94, 1.38)                         |
| Plus CVD risk factors <sup>‡</sup> ; OR (95% CI)                     | 1.00 (Ref.)            | 0.66 (0.36, 1.21) | 1.13 (0.55, 2.32) | 1.28 (0.57, 2.91) | 1.12 (0.92, 1.36)                         |

\* CKD progression defined as  $\geq 30\%$  decline in eGFR<sub>Cr</sub> at follow-up.

\*\* Adjusted for age, gender, race, education, clinic site, and urine creatinine.

<sup>†</sup> Adjusted for demographic variable plus baseline eGFR<sub>Cr</sub> and urine albumin.

<sup>‡</sup> Adjusted for demographic variables eGFR<sub>Cr</sub>, urine albumin, plus smoking status, pack-years, BMI, diabetes, SBP, BP med use, total chol., lipid med use, and CRP.
